# Supplementary material for: Longitudinal stability of medial temporal lobe connectivity is associated with tau-related memory decline
Source: eLife. 2020 Dec 31;9:e62114. doi: 10.7554/eLife.62114 (PMC7803375; doi:10.7554/eLife.62114)
Supplement: Figure 1—figure supplement 1—source data 1. [file elife-62114-fig1-figsupp1-data1.xlsx]

## Sheet: MTL
	Year 0								Year 2
	L-ENT	L-PHIP	L-HIPP	R-ENT	R-PHIP	R-HIPP			L-ENT	L-PHIP	L-HIPP	R-ENT	R-PHIP	R-HIPP
CN_Ptau-	0	0.00083399	0.00087348	NaN	NaN	0.00101212	L-ENT	CN_Ptau-	0	0.00085247	0.00089652	NaN	0.00088737	0.00087112	L-ENT
	0.00083399	0	0.00087679	0.00078531	0.00093183	0.00098693	L-PHIP		0.00085247	0	0.00089371	0.00088489	0.00094314	0.00102345	L-PHIP
	0.00087348	0.00087679	0	0.00090173	0.0010114	0.00117292	L-HIPP		0.00089652	0.00089371	0	0.00087312	0.00099591	0.00118814	L-HIPP
	NaN	0.00078531	0.00090173	0	0.00084006	0.00088825	R-ENT		NaN	0.00088489	0.00087312	0	0.00085536	0.00090664	R-ENT
	NaN	0.00093183	0.0010114	0.00084006	0	0.00090412	R-PHIP		0.00088737	0.00094314	0.00099591	0.00085536	0	0.00091717	R-PHIP
	0.00101212	0.00098693	0.00117292	0.00088825	0.00090412	0	R-HIPP		0.00087112	0.00102345	0.00118814	0.00090664	0.00091717	0	R-HIPP
CN_Ptau+	0	0.00090218	0.00090978	NaN	NaN	NaN		CN_Ptau+	0	0.00086086	0.00090479	NaN	NaN	0.00089583
	0.00090218	0	0.00094369	NaN	0.00087469	0.00108152			0.00086086	0	0.00088313	0.00087552	0.00089883	0.00097369
	0.00090978	0.00094369	0	0.00090778	0.00100515	0.00114593			0.00090479	0.00088313	0	NaN	0.00101999	0.00115331
	NaN	NaN	0.00090778	0	0.00088042	0.00090354			NaN	0.00087552	NaN	0	0.00086448	0.00093112
	NaN	0.00087469	0.00100515	0.00088042	0	0.00095199			NaN	0.00089883	0.00101999	0.00086448	0	0.00089821
	NaN	0.00108152	0.00114593	0.00090354	0.00095199	0			0.00089583	0.00097369	0.00115331	0.00093112	0.00089821	0
MCI_Ptau+	0	0.00088123	0.00091972	NaN	NaN	NaN		MCI_Ptau+	0	0.00084231	0.00090579	NaN	NaN	0.00092172
	0.00088123	0	0.00091602	NaN	0.00106454	0.00113413			0.00084231	0	0.00082747	0.00083885	0.00096351	0.00093962
	0.00091972	0.00091602	0	NaN	0.00114377	0.00127408			0.00090579	0.00082747	0	0.0008694	0.00095273	0.00098635
	NaN	NaN	NaN	0	0.00087273	0.00091642			NaN	0.00083885	0.0008694	0	0.00081841	0.00087558
	NaN	0.00106454	0.00114377	0.00087273	0	0.00092459			NaN	0.00096351	0.00095273	0.00081841	0	0.00081389
	NaN	0.00113413	0.00127408	0.00091642	0.00092459	0			0.00092172	0.00093962	0.00098635	0.00087558	0.00081389	0

## Sheet: MTL-AT
	Year 0								Year 2
	L-ENT	L-PHIP	L-HIPP	R-ENT	R-PHIP	R-HIPP			L-ENT	L-PHIP	L-HIPP	R-ENT	R-PHIP	R-HIPP
CN_Ptau-	0.000802214	0.000798367	0.000839375	NaN	NaN	0.00075518	L-LOF	CN_Ptau-	0.000807757	0.000845583	0.000845711	0.000938873	NaN	NaN	L-LOF
	0.000830983	0.000752383	0.000894424	NaN	NaN	NaN	L-MOF		0.000837177	0.000784801	0.000906597	NaN	NaN	0.000876858	L-MOF
	0.000859485	0.000911458	0.000901008	NaN	NaN	0.000781462	L-TP		0.000868921	0.000929423	0.000918339	NaN	NaN	0.000810724	L-TP
	0.000848061	0.000901288	0.000915468	NaN	0.000776189	0.000853023	L-IT		0.000836879	0.000908873	0.000917319	NaN	NaN	0.000892637	L-IT
	NaN	NaN	0.000835017	0.000841435	0.000890026	0.000881152	R-LOF		NaN	NaN	NaN	0.000834367	0.000855176	0.000885825	R-LOF
	NaN	NaN	0.000805572	0.000852141	0.000832394	0.000887725	R-MOF		NaN	NaN	NaN	0.000837575	0.000778784	0.000881254	R-MOF
	NaN	NaN	0.000809592	0.000898802	0.000883105	0.000888151	R-TP		NaN	NaN	NaN	0.00088371	0.000895608	0.000907962	R-TP
	0.000834523	NaN	0.000819366	0.000882886	0.000921575	0.000922354	R-IT		0.000807906	0.000957286	0.000863994	0.000880715	0.000919158	0.000932234	R-IT
CN_Ptau+	0.000810822	0.000862317	0.000834006	0.00107004	NaN	NaN		CN_Ptau+	0.00080578	0.000887827	0.000857304	0.000971462	NaN	NaN
	0.000864775	0.000825917	0.000916122	0.000834961	NaN	0.000845349			0.000841646	0.000799656	0.000918448	0.000799534	NaN	NaN
	0.000904714	0.000926425	0.000900065	NaN	NaN	NaN			0.000860674	0.000897506	0.000887544	NaN	NaN	NaN
	0.000861356	0.000923349	0.000893025	NaN	NaN	0.000855857			0.0008461	0.000908772	0.000900951	NaN	NaN	0.000932981
	NaN	NaN	NaN	0.000840415	0.000910551	0.000906251			NaN	NaN	0.000968541	0.000828634	0.000837139	0.000897257
	NaN	NaN	NaN	0.000853478	0.000815564	0.00087836			NaN	NaN	NaN	0.000853606	0.000842723	0.000893827
	NaN	NaN	NaN	0.000871849	0.000920666	0.000886675			NaN	NaN	NaN	0.00087037	0.000880389	0.00088209
	NaN	NaN	0.000758752	0.000865369	0.000960527	0.00091022			NaN	0.000788878	NaN	0.000869144	0.00089789	0.000902253
MCI_Ptau+	0.000822134	NaN	0.00084864	0.000941739	NaN	NaN		MCI_Ptau+	0.000851987	0.000871912	0.000867331	0.000879486	NaN	NaN
	0.00085649	NaN	0.000916991	0.000951275	NaN	NaN			0.000867278	0.000850519	0.000911465	0.00085532	NaN	NaN
	0.00088985	0.000919404	0.000912347	NaN	NaN	NaN			0.000893118	0.000918484	0.000962769	0.00084398	NaN	NaN
	0.000864723	0.000903449	0.000914048	NaN	NaN	NaN			0.000858818	0.000876393	0.000921434	0.000857922	NaN	0.000896978
	NaN	NaN	NaN	0.0008483	0.000942954	0.000915353			0.000866433	NaN	NaN	0.000874824	0.000857396	0.000899434
	NaN	NaN	NaN	0.000858095	0.00101576	0.000938986			0.000887471	NaN	NaN	0.000873726	0.000841385	0.000878723
	NaN	NaN	NaN	0.000906894	0.000917674	0.0009125			NaN	NaN	NaN	0.000914506	0.000903052	0.000949041
	NaN	0.00115945	NaN	0.000906361	0.000942632	0.000957135			0.000807825	0.000718414	0.00087569	0.000913285	0.000884716	0.00091273

## Sheet: MTL-PM
	Year 0								Year 2
	L-ENT	L-PHIP	L-HIPP	R-ENT	R-PHIP	R-HIPP			L-ENT	L-PHIP	L-HIPP	R-ENT	R-PHIP	R-HIPP
CN_Ptau-	0.000828759	0.000849438	0.000890521	0.000896049	NaN	0.000874866	L-Th	CN_Ptau-	0.000834179	0.000890593	0.000907474	0.000893604	0.0010123	0.000884025	L-Th
	0.00075948	0.000775153	0.000801754	NaN	NaN	0.000811281	L-PCC		0.000772977	0.000762019	0.000803434	NaN	NaN	0.000825597	L-PCC
	0.000804604	0.000814357	0.000900512	0.000905203	0.000959536	0.00115082	L-ISTC		0.000821403	0.000828194	0.000903264	0.000908371	0.000975281	0.0011035	L-ISTC
	0.000780188	0.000796311	0.000835895	0.000793254	0.0008503	0.000854859	L-PREC		0.000784891	0.000798489	0.000836303	0.000773432	0.000869481	0.000906058	L-PREC
	0.000832304	0.000834741	0.000897347	0.000792159	0.00079068	0.000781472	L-LO		0.000839601	0.000829766	0.000893151	NaN	0.000860374	0.000906204	L-LO
	NaN	NaN	0.000890888	0.000838862	0.000894595	0.000900586	R-Th		NaN	0.00100064	0.000873704	0.000848571	0.000911184	0.00091475	R-Th
	NaN	NaN	0.000781141	0.000781512	0.000771241	0.00079581	R-PCC		NaN	NaN	0.000823953	0.00084602	0.000777478	0.000794982	R-PCC
	0.000856331	0.00100422	0.00108307	0.000815008	0.000809572	0.000907545	R-ISTC		0.000870033	0.00100715	0.00100848	0.000836048	0.000816043	0.000906222	R-ISTC
	NaN	0.000761268	0.000820594	0.000773838	0.000770912	0.000814686	R-PREC		NaN	0.000874916	0.000854442	0.000788004	0.000781527	0.000825017	R-PREC
	NaN	0.000879601	0.000922468	0.000827164	0.000818632	0.000848601	R-LO		NaN	0.000909496	0.000958565	0.000815034	0.000817078	0.000870696	R-LO
CN_Ptau+	0.000845739	0.000839347	0.000899719	NaN	0.00105694	0.000894347		CN_Ptau+	0.000839948	0.000851007	0.000917741	NaN	NaN	0.00103615
	0.000819243	0.000797124	0.00083368	NaN	NaN	NaN			0.0008188	0.000781111	0.000804912	NaN	NaN	0.000879424
	0.000830213	0.000865904	0.000963682	0.000897555	0.00102072	0.00125004			0.000820325	0.000832877	0.000901255	0.000939713	0.000985637	0.00114301
	0.000806093	0.00080311	0.000853932	NaN	0.000908471	0.00088994			0.000784591	0.000799632	0.000824675	NaN	0.000913218	0.000913064
	0.00085484	0.000838488	0.000869106	NaN	NaN	0.0011012			0.000820872	0.000826021	0.000881138	NaN	0.000801161	0.000956537
	NaN	NaN	0.000920078	0.000862516	0.000939255	0.000922514			NaN	0.000963657	0.000950852	0.000876695	0.000863231	0.000904455
	NaN	NaN	0.000801793	0.000800615	0.000795448	0.000819393			NaN	NaN	0.000821694	0.000759153	0.00077259	0.000785973
	NaN	0.00104815	0.00106439	0.000828434	0.000860067	0.000943918			0.000871585	0.00097397	0.00114058	0.000824622	0.000816114	0.000893014
	NaN	0.000944287	0.000864261	0.000790811	0.00078981	0.00084286			0.000859725	0.000870383	0.000846599	0.00078465	0.000782008	0.000826897
	NaN	NaN	0.000949339	0.000853908	0.000815767	0.000867628			NaN	0.000920971	NaN	0.000841316	0.000805284	0.000856147
MCI_Ptau+	0.000872895	0.00088306	0.000936563	NaN	NaN	0.00103701		MCI_Ptau+	0.000837587	0.000850542	0.000867723	NaN	NaN	0.000964356
	0.000809567	0.000781238	0.000804031	NaN	NaN	0.000900324			0.000781705	0.000776469	0.00078379	NaN	NaN	0.000880556
	0.000846456	0.000844415	0.000932795	0.000936367	0.00102032	0.00117331			0.00079078	0.000769517	0.000808665	0.000809108	0.000912502	0.000898185
	0.000796253	0.000810014	0.000842529	0.000808679	0.000923938	0.000942015			0.000787495	0.000773904	0.000795174	0.000818537	0.000812073	0.000843758
	0.000843239	0.000831655	0.000875659	0.000923107	0.000853139	0.000910647			0.000861202	0.000806289	0.000851136	0.000919751	0.000868244	0.000869916
	0.000831991	0.0012163	0.00095201	0.000882743	0.000844936	0.000944296			0.000829156	0.00115648	0.000984401	0.000834119	0.000847393	0.000869778
	NaN	NaN	0.000908529	0.000793553	0.000776234	0.000782493			0.000780082	NaN	0.000789563	0.000789111	0.000756435	0.000787109
	0.000833142	0.00105115	0.00113052	0.000844457	0.000834095	0.000936879			0.000884486	0.000926133	0.000907015	0.000787572	0.000753425	0.000801589
	NaN	0.00101015	0.000800864	0.000801941	0.000784083	0.000826839			0.000764203	0.000864358	0.000853154	0.000790568	0.000769821	0.000802168
	NaN	0.000898477	0.000887437	0.000805789	0.000805094	0.000853947			0.000887726	0.000901206	0.000869798	0.000799432	0.000796204	0.000836438
