# Supplementary material for: Longitudinal stability of medial temporal lobe connectivity is associated with tau-related memory decline
Source: eLife. 2020 Dec 31;9:e62114. doi: 10.7554/eLife.62114 (PMC7803375; doi:10.7554/eLife.62114)
Supplement: Figure 3—source data 1. [file elife-62114-fig3-data1.xlsx]

## Sheet: data
id	age	Neurodegeneration	abeta	Stability_mtl	Stability_mtl_at	Stability_mtl_pm
CN-1	84.1	2.69825	827.3	0.812925	0.543573	0.720934
CN-2	73.1	3.00137	1352	0.677621	0.945787	0.724826
CN-3	78.5	2.74337	712.2	0.779584	0.758829	0.736712
CN-4	73.3	2.93038	1775	-0.0497741	-0.29788	0.906477
CN-5	72.5	2.9445	716.6	0.53728	0.872359	0.905568
CN-6	73	2.95087	1918	0.742609	0.793423	0.869641
CN-7	62.4	2.96312	867.5	0.210446	0.687932	0.650085
CN-8	76.4	3.06575	1099	0.73937	0.788238	0.933609
CN-9	78.5	2.9715	981.6	0.801785	-0.194938	0.513795
CN-10	75.2	2.97038	1955	0.750176	0.94262	0.945436
CN-11	71.8	3.17988	1245	0.760033	0.458084	0.945411
CN-12	71.6	2.9415	964.7	0.603459	0.772531	0.601942
CN-13	70.4	3.05863	2140	0.636522	0.366598	0.81944
CN-14	65.1	2.96088	1279	0.837642	0.89777	0.896407
CN-15	70.9	3.061	351.4	0.896408	0.777306	0.938188
CN-16	76.4	2.9815	539.1	0.219803	0.752716	0.914988
CN-17	73.3	3.06562	2667	0.898232	0.875988	0.950328
CN-18	73.8	3.0705	1002	0.936497	0.870514	0.76643
CN-19	78.5	2.801	771.9	0.415491	0.582683	0.927217
CN-20	68.3	3.05225	1210	0.514377	0.881354	0.903245
CN-21	77	3.11262	1985	-0.152832	0.612869	0.944113
CN-22	79	2.9505	1142	0.640232	0.400552	-0.0445779
CN-23	76.5	2.90488	1112	0.694791	0.820849	0.967597
CN-24	69.6	2.83625	1269	0.475503	0.642131	0.0696865
CN-25	77.9	2.93012	1709	0.848843	0.746364	0.917693
CN-26	75.6	2.98488	416.8	0.574729	0.693205	0.755741
CN+1	72.4	3.0135	1274	0.653584	-0.000329122	0.865635
CN+2	76.2	2.71663	1893	0.240524	0.302338	0.977897
CN+3	72.8	3.08263	715.5	0.57061	0.691016	0.755602
CN+4	79.4	3.07825	1826	0.561443	0.747728	0.875922
CN+5	83.9	2.84138	2612	-0.0804059	0.123845	0.656626
CN+6	68.4	3.04075	2249	0.359952	0.822515	0.984081
CN+7	67.8	2.82675	957.2	0.526678	0.290565	0.858073
CN+8	70.9	2.79825	1373	-0.43284	0.94076	0.8902
CN+9	84	3.03375	1841	-0.358996	0.383338	0.518941
CN+10	69.4	2.906	2060	0.743753	0.833131	0.820852
CN+11	76.4	2.78	469.2	0.695272	0.567885	0.869899
CN+12	65.8	3.10062	1490	0.159311	-0.519915	0.994198
CN+13	70	2.62887	595.7	0.242812	-0.168986	0.600633
CN+14	85.7	2.51337	1141	-0.643028	-0.219095	0.618536
CN+15	75.2	2.82525	466.1	0.892481	0.394603	0.833284
CN+16	71.9	2.85375	780.3	0.305044	0.471113	0.99097
CN+17	82	2.98825	2460	0.942177	0.89098	0.938563
CN+18	74.4	3.06738	928.3	0.856591	0.142056	0.7527
MCI+1	77.5	2.66387	709.2	0.752266	0.852324	0.684005
MCI+2	82.8	2.51912	632.1	-0.419898	0.478003	0.537364
MCI+3	82.4	2.66463	1124	-0.0388591	0.346347	0.764689
MCI+4	68.2	2.58887	530	-0.637894	-0.983171	0.054375
MCI+5	74.4	2.949	1700	0.837932	0.722864	0.954087
MCI+6	75.9	2.75888	1700	0.983787	-0.174023	0.809782
MCI+7	73	2.82175	909.4	-0.294949	0.548551	-0.283202
MCI+8	88	2.93938	892.1	0.428468	0.294122	0.860951
MCI+9	71.4	2.9305	778.8	0.387103	-0.174206	0.71272
MCI+10	64	3.05912	1700	0.950795	0.390592	0.549723
MCI+11	70.9	2.82138	337.5	0.170714	-0.075159	0.225468
MCI+12	71	2.79438	737.1	0.122299	0.655447	0.405158
MCI+13	75.9	2.89162	1272	0.401738	0.598348	0.475911
MCI+14	76.2	2.41087	651.3	-0.121139	0.603158	0.0217156
MCI+15	78.2	2.88075	697.3	0.0720079	-0.0826498	0.594821
MCI+16	77.9	2.7515	608.9	0.363825	0.570706	-0.149968
MCI+17	69.3	2.413	1700	0.35921	0.305324	-0.150905
MCI+18	61	3.08562	1105	-0.495137	-0.0409005	0.00439742
MCI+19	86.3	2.90987	667.9	0.917015	0.0350765	0.571477
MCI+20	79.9	2.53337	733.7	0.273209	0.483594	0.945836
MCI+21	74.4	2.69738	1127	0.62912	-0.0233872	0.858101
MCI+22	77.8	2.53762	748.8	0.547571	0.152077	0.568339
MCI+23	72.6	3.16425	617.8	-0.241901	0.569336	0.31036
MCI+24	76	2.89237	845.8	0.268104	0.608531	0.69354
MCI+25	68.4	2.81462	888.5	0.833634	0.118162	0.533056
MCI+26	55.2	2.92725	662.4	0.637498	0.689468	0.505002
MCI+27	75	2.59075	408.4	0.668854	0.134289	0.571439
MCI+28	59.8	2.99912	533.5	0.712175	0.319116	0.444579
MCI+29	75.4	2.65187	818.6	0.372623	0.567545	0.0777219
MCI+30	77.9	2.56137	883.9	0.947557	0.920624	0.615614
