# Supplementary material for: Longitudinal stability of medial temporal lobe connectivity is associated with tau-related memory decline
Source: eLife. 2020 Dec 31;9:e62114. doi: 10.7554/eLife.62114 (PMC7803375; doi:10.7554/eLife.62114)
Supplement: Figure 4—source data 1. [file elife-62114-fig4-data1.xlsx]

## Sheet: data
id	ptau	Stability_mtl	Stability_mtl_at	Stability_mtl_pm	age>75	Neurodegeneration<2.77	abeta<976.6
CN-1	8.87	0.812925	0.543573	0.720934	1	1	1
CN-2	15.01	0.677621	0.945787	0.724826	0	0	0
CN-3	19.27	0.779584	0.758829	0.736712	1	1	1
CN-4	20.11	-0.0497741	-0.29788	0.906477	0	0	0
CN-5	10.96	0.53728	0.872359	0.905568	0	0	1
CN-6	18.8	0.742609	0.793423	0.869641	0	0	0
CN-7	9.86	0.210446	0.687932	0.650085	0	0	1
CN-8	21.77	0.73937	0.788238	0.933609	1	0	0
CN-9	13.69	0.801785	-0.194938	0.513795	1	0	0
CN-10	17.55	0.750176	0.94262	0.945436	1	0	0
CN-11	17.1	0.760033	0.458084	0.945411	0	0	0
CN-12	11.33	0.603459	0.772531	0.601942	0	0	1
CN-13	18.98	0.636522	0.366598	0.81944	0	0	0
CN-14	14.03	0.837642	0.89777	0.896407	0	0	0
CN-15	19.09	0.896408	0.777306	0.938188	0	0	1
CN-16	21.56	0.219803	0.752716	0.914988	1	0	1
CN-17	21.78	0.898232	0.875988	0.950328	0	0	0
CN-18	15.92	0.936497	0.870514	0.76643	0	0	0
CN-19	17.63	0.415491	0.582683	0.927217	1	0	1
CN-20	12.16	0.514377	0.881354	0.903245	0	0	0
CN-21	19.64	-0.152832	0.612869	0.944113	1	0	0
CN-22	13.05	0.640232	0.400552	-0.0445779	1	0	0
CN-23	9.63	0.694791	0.820849	0.967597	1	0	0
CN-24	14.56	0.475503	0.642131	0.0696865	0	0	0
CN-25	21.07	0.848843	0.746364	0.917693	1	0	0
CN-26	8.53	0.574729	0.693205	0.755741	1	0	1
CN+1	28.47	0.653584	-0.000329122	0.865635	0	0	0
CN+2	22.26	0.240524	0.302338	0.977897	1	1	0
CN+3	22.37	0.57061	0.691016	0.755602	0	0	1
CN+4	30.31	0.561443	0.747728	0.875922	1	0	0
CN+5	29.37	-0.0804059	0.123845	0.656626	1	0	0
CN+6	24.56	0.359952	0.822515	0.984081	0	0	0
CN+7	24.15	0.526678	0.290565	0.858073	0	0	1
CN+8	30.51	-0.43284	0.94076	0.8902	0	0	0
CN+9	26.29	-0.358996	0.383338	0.518941	1	0	0
CN+10	21.86	0.743753	0.833131	0.820852	0	0	0
CN+11	21.87	0.695272	0.567885	0.869899	1	0	1
CN+12	26.06	0.159311	-0.519915	0.994198	0	0	0
CN+13	51	0.242812	-0.168986	0.600633	0	1	1
CN+14	40.99	-0.643028	-0.219095	0.618536	1	1	0
CN+15	24.78	0.892481	0.394603	0.833284	1	0	1
CN+16	34.39	0.305044	0.471113	0.99097	0	0	1
CN+17	26.59	0.942177	0.89098	0.938563	1	0	0
CN+18	36.39	0.856591	0.142056	0.7527	0	0	1
MCI+1	40.95	0.752266	0.852324	0.684005	1	1	1
MCI+2	32.49	-0.419898	0.478003	0.537364	1	1	1
MCI+3	30.59	-0.0388591	0.346347	0.764689	1	1	0
MCI+4	23.14	-0.637894	-0.983171	0.054375	0	1	1
MCI+5	29.38	0.837932	0.722864	0.954087	0	0	0
MCI+6	23.17	0.983787	-0.174023	0.809782	1	1	0
MCI+7	33.64	-0.294949	0.548551	-0.283202	0	0	1
MCI+8	38.61	0.428468	0.294122	0.860951	1	0	1
MCI+9	35.37	0.387103	-0.174206	0.71272	0	0	1
MCI+10	30.06	0.950795	0.390592	0.549723	0	0	0
MCI+11	27.73	0.170714	-0.075159	0.225468	0	0	1
MCI+12	46.13	0.122299	0.655447	0.405158	0	0	1
MCI+13	24.45	0.401738	0.598348	0.475911	1	0	0
MCI+14	51.53	-0.121139	0.603158	0.0217156	1	1	1
MCI+15	30.48	0.0720079	-0.0826498	0.594821	1	0	1
MCI+16	37.45	0.363825	0.570706	-0.149968	1	1	1
MCI+17	27.57	0.35921	0.305324	-0.150905	0	1	0
MCI+18	39.17	-0.495137	-0.0409005	0.00439742	0	0	0
MCI+19	27.55	0.917015	0.0350765	0.571477	1	0	1
MCI+20	52.77	0.273209	0.483594	0.945836	1	1	1
MCI+21	51.87	0.62912	-0.0233872	0.858101	0	1	0
MCI+22	74.27	0.547571	0.152077	0.568339	1	1	1
MCI+23	57.71	-0.241901	0.569336	0.31036	0	0	1
MCI+24	50.75	0.268104	0.608531	0.69354	1	0	1
MCI+25	36.33	0.833634	0.118162	0.533056	0	0	1
MCI+26	42.25	0.637498	0.689468	0.505002	0	0	1
MCI+27	56.81	0.668854	0.134289	0.571439	0	1	1
MCI+28	25.35	0.712175	0.319116	0.444579	0	0	1
MCI+29	29.74	0.372623	0.567545	0.0777219	1	1	1
MCI+30	33.02	0.947557	0.920624	0.615614	1	1	1
