# Supplementary material for: Longitudinal stability of medial temporal lobe connectivity is associated with tau-related memory decline
Source: eLife. 2020 Dec 31;9:e62114. doi: 10.7554/eLife.62114 (PMC7803375; doi:10.7554/eLife.62114)
Supplement: Figure 5—source data 1. [file elife-62114-fig5-data1.xlsx]

## Sheet: data
id	Stability_mtl	Stability_mtl_at	Stability_mtl_pm	Memory_mean	Memory_rate	age	sex (1 male, 0 female)	edu	Neurodegeneration<2.77	abeta
CN-1	0.812925	0.543573	0.720934	-0.52	-0.0775	84.1	1	20	1	827.3
CN-2	0.677621	0.945787	0.724826	2.08	-0.0982857	73.1	1	18	0	1352
CN-3	0.779584	0.758829	0.736712	1.12	0.24	78.5	0	16	1	712.2
CN-4	-0.0497741	-0.29788	0.906477	0.365	-0.104571	73.3	1	18	0	1775
CN-5	0.53728	0.872359	0.905568	0.4625	0.118	72.5	0	14	0	716.6
CN-6	0.742609	0.793423	0.869641	1.3775	0.0454286	73	1	13	0	1918
CN-7	0.210446	0.687932	0.650085	1.69	-0.102857	62.4	1	18	0	867.5
CN-8	0.73937	0.788238	0.933609	0.8325	0.054	76.4	0	16	0	1099
CN-9	0.801785	-0.194938	0.513795	0.393333	0.555	78.5	0	12	0	981.6
CN-10	0.750176	0.94262	0.945436	-0.106667	0.05	75.2	0	14	0	1955
CN-11	0.760033	0.458084	0.945411	1.485	0.170857	71.8	0	19	0	1245
CN-12	0.603459	0.772531	0.601942	1.07	0.128	71.6	1	19	0	964.7
CN-13	0.636522	0.366598	0.81944	1.66333	-0.195	70.4	0	20	0	2140
CN-14	0.837642	0.89777	0.896407	1.9725	0.0882857	65.1	1	19	0	1279
CN-15	0.896408	0.777306	0.938188	1.275	0.133143	70.9	0	18	0	351.4
CN-16	0.219803	0.752716	0.914988	1.3325	0.00371429	76.4	0	14	0	539.1
CN-17	0.898232	0.875988	0.950328	0.21	0.00571429	73.3	1	18	0	2667
CN-18	0.936497	0.870514	0.76643	0.5925	0.062	73.8	1	16	0	1002
CN-19	0.415491	0.582683	0.927217	0.3275	-0.00942857	78.5	1	14	0	771.9
CN-20	0.514377	0.881354	0.903245	1.3125	0.0311429	68.3	0	20	0	1210
CN-21	-0.152832	0.612869	0.944113	1.08	-0.1075	77	1	20	0	1985
CN-22	0.640232	0.400552	-0.0445779	-0.35	-0.0925	79	0	18	0	1142
CN-23	0.694791	0.820849	0.967597	0.76	0.0975	76.5	0	18	0	1112
CN-24	0.475503	0.642131	0.0696865	-0.246667	-0.0142857	69.6	0	12	0	1269
CN-25	0.848843	0.746364	0.917693	0.57	-0.2275	77.9	0	15	0	1709
CN-26	0.574729	0.693205	0.755741	-0.3	nan	75.6	0	15	0	416.8
CN+1	0.653584	-0.000329122	0.865635	0.4425	-0.015	72.4	0	16	0	1274
CN+2	0.240524	0.302338	0.977897	-0.2125	-0.111143	76.2	0	18	1	1893
CN+3	0.57061	0.691016	0.755602	-0.3775	0.0162857	72.8	0	12	0	715.5
CN+4	0.561443	0.747728	0.875922	2.08	-0.0354286	79.4	1	20	0	1826
CN+5	-0.0804059	0.123845	0.656626	-0.666667	0.015	83.9	1	16	0	2612
CN+6	0.359952	0.822515	0.984081	0.53	-0.3	68.4	1	20	0	2249
CN+7	0.526678	0.290565	0.858073	0.716667	-0.215	67.8	1	18	0	957.2
CN+8	-0.43284	0.94076	0.8902	0.6975	-0.403714	70.9	0	15	0	1373
CN+9	-0.358996	0.383338	0.518941	0.286667	0.275	84	1	20	0	1841
CN+10	0.743753	0.833131	0.820852	1.7	0	69.4	0	19	0	2060
CN+11	0.695272	0.567885	0.869899	1.02667	0.72	76.4	1	19	0	469.2
CN+12	0.159311	-0.519915	0.994198	1.67	0.1775	65.8	0	18	0	1490
CN+13	0.242812	-0.168986	0.600633	2.42333	-0.0425	70	1	20	1	595.7
CN+14	-0.643028	-0.219095	0.618536	0.2	-0.1	85.7	0	16	1	1141
CN+15	0.892481	0.394603	0.833284	0.686667	0.16	75.2	0	18	0	466.1
CN+16	0.305044	0.471113	0.99097	0.13	-0.03	71.9	0	15	0	780.3
CN+17	0.942177	0.89098	0.938563	0.416667	-0.08	82	0	18	0	2460
CN+18	0.856591	0.142056	0.7527	0.675	nan	74.4	0	13	0	928.3
MCI+1	0.752266	0.852324	0.684005	0.1475	-0.173	77.5	1	18	1	709.2
MCI+2	-0.419898	0.478003	0.537364	-0.2325	-0.099	82.8	0	12	1	632.1
MCI+3	-0.0388591	0.346347	0.764689	-0.256	-0.096	82.4	0	14	1	1124
MCI+4	-0.637894	-0.983171	0.054375	-0.88	-0.295	68.2	1	14	1	530
MCI+5	0.837932	0.722864	0.954087	0.614	-0.187	74.4	1	18	0	1700
MCI+6	0.983787	-0.174023	0.809782	0.064	0.117	75.9	1	15	1	1700
MCI+7	-0.294949	0.548551	-0.283202	-0.102	-0.128	73	0	12	0	909.4
MCI+8	0.428468	0.294122	0.860951	-0.208	-0.164	88	0	12	0	892.1
MCI+9	0.387103	-0.174206	0.71272	0.416	-0.23	71.4	0	16	0	778.8
MCI+10	0.950795	0.390592	0.549723	1.652	0.093	64	1	18	0	1700
MCI+11	0.170714	-0.075159	0.225468	-1.155	-0.714	70.9	1	20	0	337.5
MCI+12	0.122299	0.655447	0.405158	0.246	-0.05	71	0	17	0	737.1
MCI+13	0.401738	0.598348	0.475911	-0.15	0.128	75.9	1	14	0	1272
MCI+14	-0.121139	0.603158	0.0217156	-1.518	-0.413	76.2	0	16	1	651.3
MCI+15	0.0720079	-0.0826498	0.594821	-0.62	-0.003	78.2	1	16	0	697.3
MCI+16	0.363825	0.570706	-0.149968	0.302	-0.314	77.9	0	13	1	608.9
MCI+17	0.35921	0.305324	-0.150905	0.426	-0.199	69.3	1	18	1	1700
MCI+18	-0.495137	-0.0409005	0.00439742	0.803333	0.125	61	0	16	0	1105
MCI+19	0.917015	0.0350765	0.571477	-0.828	-0.035	86.3	1	17	0	667.9
MCI+20	0.273209	0.483594	0.945836	-1.1	-0.067	79.9	1	12	1	733.7
MCI+21	0.62912	-0.0233872	0.858101	0.426	-0.228	74.4	1	17	1	1127
MCI+22	0.547571	0.152077	0.568339	-1.7575	-0.451	77.8	0	19	1	748.8
MCI+23	-0.241901	0.569336	0.31036	-0.096	0.037	72.6	0	12	0	617.8
MCI+24	0.268104	0.608531	0.69354	-1	-0.214857	76	1	16	0	845.8
MCI+25	0.833634	0.118162	0.533056	-0.66	-0.293	68.4	1	16	0	888.5
MCI+26	0.637498	0.689468	0.505002	1.586	0.081	55.2	1	16	0	662.4
MCI+27	0.668854	0.134289	0.571439	1.766	-0.065	75	1	20	1	408.4
MCI+28	0.712175	0.319116	0.444579	0.732	-0.033	59.8	1	15	0	533.5
MCI+29	0.372623	0.567545	0.0777219	-0.475	-0.084	75.4	0	15	1	818.6
MCI+30	0.947557	0.920624	0.615614	1.41	-0.254	77.9	1	16	1	883.9
