# Supplementary material for: Longitudinal stability of medial temporal lobe connectivity is associated with tau-related memory decline
Source: eLife. 2020 Dec 31;9:e62114. doi: 10.7554/eLife.62114 (PMC7803375; doi:10.7554/eLife.62114)
Supplement: Figure 6—source data 1. [file elife-62114-fig6-data1.xlsx]

## Sheet: data
id	Stability_mtl	Stability_mtl_terciles (-1, low; 0, medium; 1, high)	ptau	Memory_rate	age	sex (1 male, 0 female))	edu	Neurodegeneration<2.77	abeta
CN-1	0.812925	1	8.87	-0.0775	84.1	1	20	1	827.3
CN-2	0.677621	0	15.01	-0.0982857	73.1	1	18	0	1352
CN-3	0.779584	1	19.27	0.24	78.5	0	16	1	712.2
CN-4	-0.0497741	-1	20.11	-0.104571	73.3	1	18	0	1775
CN-5	0.53728	0	10.96	0.118	72.5	0	14	0	716.6
CN-6	0.742609	1	18.8	0.0454286	73	1	13	0	1918
CN-7	0.210446	-1	9.86	-0.102857	62.4	1	18	0	867.5
CN-8	0.73937	1	21.77	0.054	76.4	0	16	0	1099
CN-9	0.801785	1	13.69	0.555	78.5	0	12	0	981.6
CN-10	0.750176	1	17.55	0.05	75.2	0	14	0	1955
CN-11	0.760033	1	17.1	0.170857	71.8	0	19	0	1245
CN-12	0.603459	0	11.33	0.128	71.6	1	19	0	964.7
CN-13	0.636522	0	18.98	-0.195	70.4	0	20	0	2140
CN-14	0.837642	1	14.03	0.0882857	65.1	1	19	0	1279
CN-15	0.896408	1	19.09	0.133143	70.9	0	18	0	351.4
CN-16	0.219803	-1	21.56	0.00371429	76.4	0	14	0	539.1
CN-17	0.898232	1	21.78	0.00571429	73.3	1	18	0	2667
CN-18	0.936497	1	15.92	0.062	73.8	1	16	0	1002
CN-19	0.415491	0	17.63	-0.00942857	78.5	1	14	0	771.9
CN-20	0.514377	0	12.16	0.0311429	68.3	0	20	0	1210
CN-21	-0.152832	-1	19.64	-0.1075	77	1	20	0	1985
CN-22	0.640232	0	13.05	-0.0925	79	0	18	0	1142
CN-23	0.694791	0	9.63	0.0975	76.5	0	18	0	1112
CN-24	0.475503	0	14.56	-0.0142857	69.6	0	12	0	1269
CN-25	0.848843	1	21.07	-0.2275	77.9	0	15	0	1709
CN-26	0.574729	0	8.53	nan	75.6	0	15	0	416.8
CN+1	0.653584	0	28.47	-0.015	72.4	0	16	0	1274
CN+2	0.240524	-1	22.26	-0.111143	76.2	0	18	1	1893
CN+3	0.57061	0	22.37	0.0162857	72.8	0	12	0	715.5
CN+4	0.561443	0	30.31	-0.0354286	79.4	1	20	0	1826
CN+5	-0.0804059	-1	29.37	0.015	83.9	1	16	0	2612
CN+6	0.359952	0	24.56	-0.3	68.4	1	20	0	2249
CN+7	0.526678	0	24.15	-0.215	67.8	1	18	0	957.2
CN+8	-0.43284	-1	30.51	-0.403714	70.9	0	15	0	1373
CN+9	-0.358996	-1	26.29	0.275	84	1	20	0	1841
CN+10	0.743753	1	21.86	0	69.4	0	19	0	2060
CN+11	0.695272	0	21.87	0.72	76.4	1	19	0	469.2
CN+12	0.159311	-1	26.06	0.1775	65.8	0	18	0	1490
CN+13	0.242812	-1	51	-0.0425	70	1	20	1	595.7
CN+14	-0.643028	-1	40.99	-0.1	85.7	0	16	1	1141
CN+15	0.892481	1	24.78	0.16	75.2	0	18	0	466.1
CN+16	0.305044	-1	34.39	-0.03	71.9	0	15	0	780.3
CN+17	0.942177	1	26.59	-0.08	82	0	18	0	2460
CN+18	0.856591	1	36.39	nan	74.4	0	13	0	928.3
MCI+1	0.752266	1	40.95	-0.173	77.5	1	18	1	709.2
MCI+2	-0.419898	-1	32.49	-0.099	82.8	0	12	1	632.1
MCI+3	-0.0388591	-1	30.59	-0.096	82.4	0	14	1	1124
MCI+4	-0.637894	-1	23.14	-0.295	68.2	1	14	1	530
MCI+5	0.837932	1	29.38	-0.187	74.4	1	18	0	1700
MCI+6	0.983787	1	23.17	0.117	75.9	1	15	1	1700
MCI+7	-0.294949	-1	33.64	-0.128	73	0	12	0	909.4
MCI+8	0.428468	0	38.61	-0.164	88	0	12	0	892.1
MCI+9	0.387103	0	35.37	-0.23	71.4	0	16	0	778.8
MCI+10	0.950795	1	30.06	0.093	64	1	18	0	1700
MCI+11	0.170714	-1	27.73	-0.714	70.9	1	20	0	337.5
MCI+12	0.122299	-1	46.13	-0.05	71	0	17	0	737.1
MCI+13	0.401738	0	24.45	0.128	75.9	1	14	0	1272
MCI+14	-0.121139	-1	51.53	-0.413	76.2	0	16	1	651.3
MCI+15	0.0720079	-1	30.48	-0.003	78.2	1	16	0	697.3
MCI+16	0.363825	0	37.45	-0.314	77.9	0	13	1	608.9
MCI+17	0.35921	-1	27.57	-0.199	69.3	1	18	1	1700
MCI+18	-0.495137	-1	39.17	0.125	61	0	16	0	1105
MCI+19	0.917015	1	27.55	-0.035	86.3	1	17	0	667.9
MCI+20	0.273209	-1	52.77	-0.067	79.9	1	12	1	733.7
MCI+21	0.62912	0	51.87	-0.228	74.4	1	17	1	1127
MCI+22	0.547571	0	74.27	-0.451	77.8	0	19	1	748.8
MCI+23	-0.241901	-1	57.71	0.037	72.6	0	12	0	617.8
MCI+24	0.268104	-1	50.75	-0.214857	76	1	16	0	845.8
MCI+25	0.833634	1	36.33	-0.293	68.4	1	16	0	888.5
MCI+26	0.637498	0	42.25	0.081	55.2	1	16	0	662.4
MCI+27	0.668854	0	56.81	-0.065	75	1	20	1	408.4
MCI+28	0.712175	1	25.35	-0.033	59.8	1	15	0	533.5
MCI+29	0.372623	0	29.74	-0.084	75.4	0	15	1	818.6
MCI+30	0.947557	1	33.02	-0.254	77.9	1	16	1	883.9
