# Supplementary material for: Longitudinal stability of medial temporal lobe connectivity is associated with tau-related memory decline
Source: eLife journal article supplement (doi:10.7554/elife.62114), 2020-12-31

# Figure 1-figure supplement 1

Average mean diffusivity (MD) matrices for each group at each time point

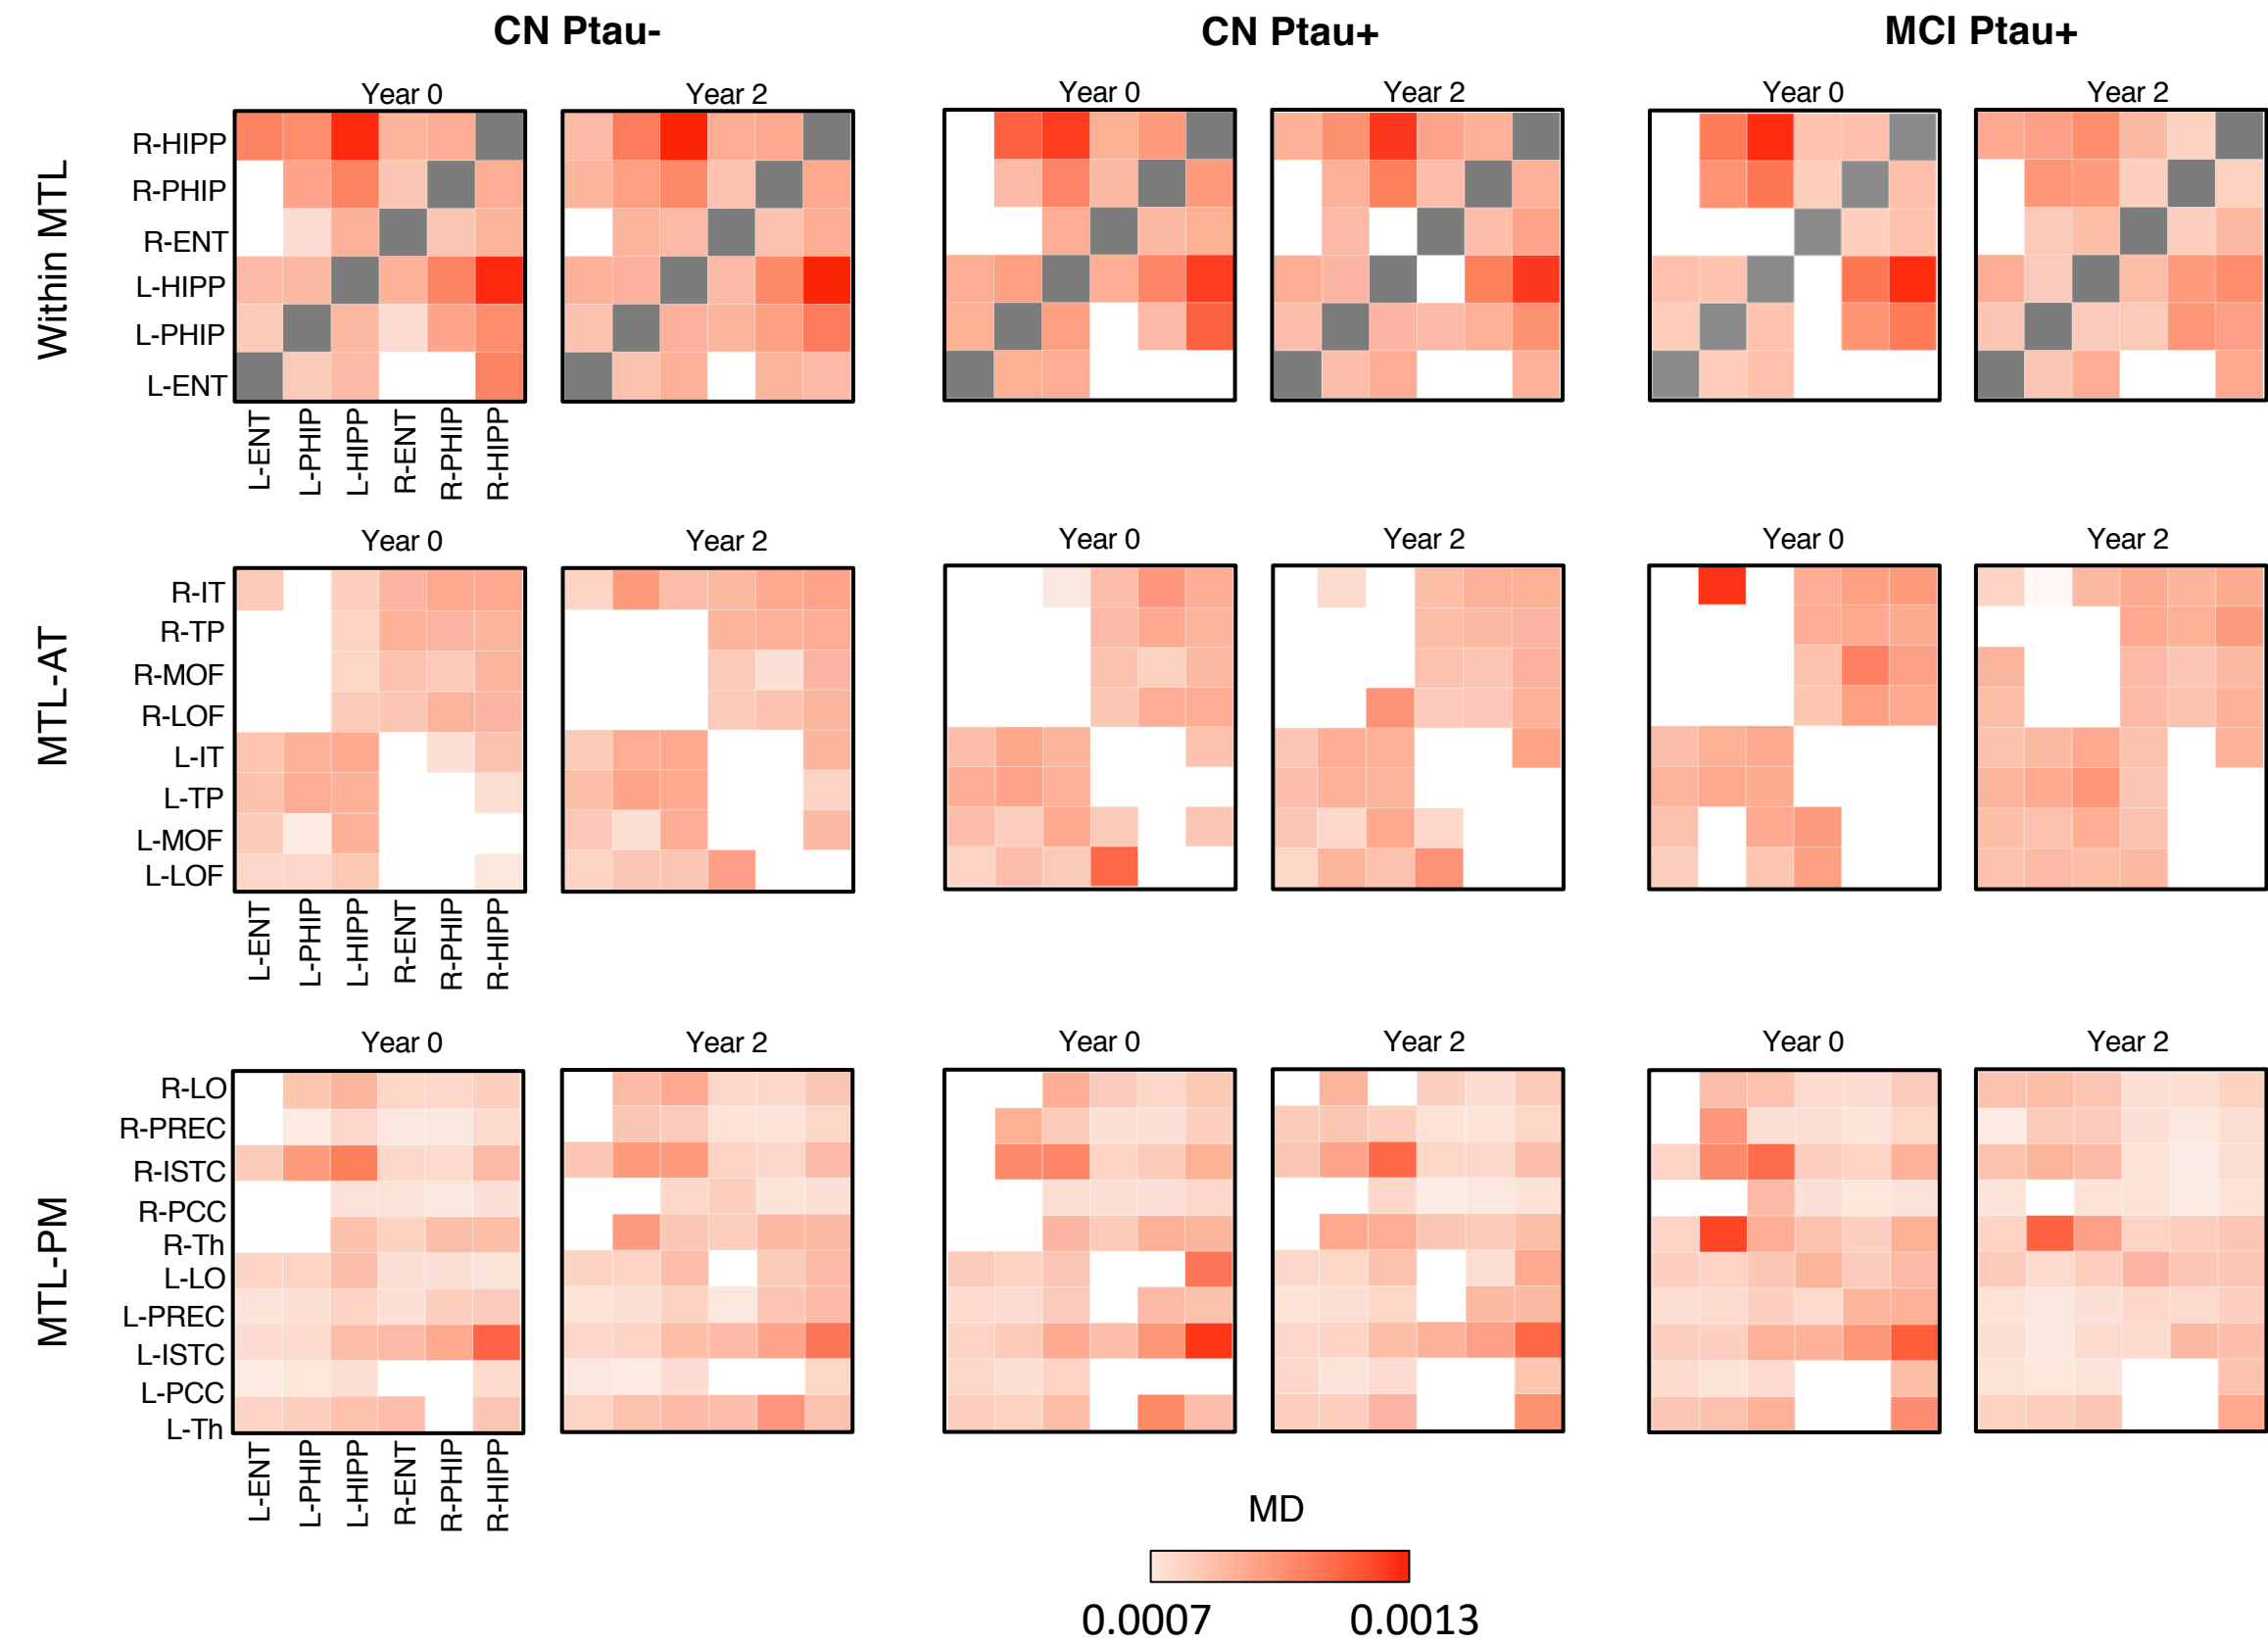

Supplement: supp [file elife-62114-supp-v2.zip]
