# Supplementary material for: Longitudinal stability of medial temporal lobe connectivity is associated with tau-related memory decline
Source: eLife. 2020 Dec 31;9:e62114. doi: 10.7554/eLife.62114 (PMC7803375; doi:10.7554/eLife.62114)
Supplement: Table 1—source data 1. [file elife-62114-table1-data1.xlsx]

## Sheet: data
id	age	age>75	sex (1 male, 0 female))	edu	apoe	Neurodegeneration	Neurodegeneration<2.77	abeta	abeta<976.6	ptau	ptau>21.8	Memory_baseline	MOCA_baseline
CN-1	84.1	1	1	20	0	2.69825	1	827.3	1	8.87	0	-0.475	25
CN-2	73.1	0	1	18	0	3.00137	0	1352	0	15.01	0	2.148	25
CN-3	78.5	1	0	16	1	2.74337	1	712.2	1	19.27	0	0.748	28
CN-4	73.3	0	1	18	0	2.93038	0	1775	0	20.11	0	0.204	26
CN-5	72.5	0	0	14	0	2.9445	0	716.6	1	10.96	0	0.443	26
CN-6	73	0	1	13	0	2.95087	0	1918	0	18.8	0	1.037	28
CN-7	62.4	0	1	18	0	2.96312	0	867.5	1	9.86	0	2.004	25
CN-8	76.4	1	0	16	1	3.06575	0	1099	0	21.77	0	0.527	25
CN-9	78.5	1	0	12	0	2.9715	0	981.6	0	13.69	0	0.034	26
CN-10	75.2	1	0	14	0	2.97038	0	1955	0	17.55	0	0.007	23
CN-11	71.8	0	0	19	0	3.17988	0	1245	0	17.1	0	1.043	27
CN-12	71.6	0	1	19	0	2.9415	0	964.7	1	11.33	0	1.142	24
CN-13	70.4	0	0	20	0	3.05863	0	2140	0	18.98	0	2.317	24
CN-14	65.1	0	1	19	1	2.96088	0	1279	0	14.03	0	2.086	29
CN-15	70.9	0	0	18	0	3.061	0	351.4	1	19.09	0	1.114	29
CN-16	76.4	1	0	14	0	2.9815	0	539.1	1	21.56	0	1.453	26
CN-17	73.3	0	1	18	0	3.06562	0	2667	0	21.78	0	-0.054	24
CN-18	73.8	0	1	16	1	3.0705	0	1002	0	15.92	0	0.326	26
CN-19	78.5	1	1	14	0	2.801	0	771.9	1	17.63	0	0.087	23
CN-20	68.3	0	0	20	0	3.05225	0	1210	0	12.16	0	1.263	29
CN-21	77	1	1	20	0	3.11262	0	1985	0	19.64	0	1.086	26
CN-22	79	1	0	18	0	2.9505	0	1142	0	13.05	0	-0.192	24
CN-23	76.5	1	0	18	0	2.90488	0	1112	0	9.63	0	0.628	27
CN-24	69.6	0	0	12	0	2.83625	0	1269	0	14.56	0	-0.222	22
CN-25	77.9	1	0	15	0	2.93012	0	1709	0	21.07	0	1.022	30
CN-26	75.6	1	0	15	1	2.98488	0	416.8	1	8.53	0	-0.3	27
CN+1	72.4	0	0	16	1	3.0135	0	1274	0	28.47	1	0.628	24
CN+2	76.2	1	0	18	0	2.71663	1	1893	0	22.26	1	-0.01	24
CN+3	72.8	0	0	12	1	3.08263	0	715.5	1	22.37	1	-0.144	27
CN+4	79.4	1	1	20	0	3.07825	0	1826	0	30.31	1	2.065	27
CN+5	83.9	1	1	16	0	2.84138	0	2612	0	29.37	1	-0.618	22
CN+6	68.4	0	1	20	0	3.04075	0	2249	0	24.56	1	0.628	24
CN+7	67.8	0	1	18	1	2.82675	0	957.2	1	24.15	1	0.957	24
CN+8	70.9	0	0	15	0	2.79825	0	1373	0	30.51	1	1.442	28
CN+9	84	1	1	20	0	3.03375	0	1841	0	26.29	1	0.079	26
CN+10	69.4	0	0	19	0	2.906	0	2060	0	21.86	1	1.037	28
CN+11	76.4	1	1	19	1	2.78	0	469.2	1	21.87	1	0.517	24
CN+12	65.8	0	0	18	1	3.10062	0	1490	0	26.06	1	1.134	29
CN+13	70	0	1	20	1	2.62887	1	595.7	1	51	1	2.629	30
CN+14	85.7	1	0	16	0	2.51337	1	1141	0	40.99	1	0.239	24
CN+15	75.2	1	0	18	0	2.82525	0	466.1	1	24.78	1	0.383	22
CN+16	71.9	0	0	15	1	2.85375	0	780.3	1	34.39	1	0.199	25
CN+17	82	1	0	18	0	2.98825	0	2460	0	26.59	1	0.748	29
CN+18	74.4	0	0	13	0	3.06738	0	928.3	1	36.39	1	0.234	29
MCI+1	77.5	1	1	18	1	2.66387	1	709.2	1	40.95	1	0.303	23
MCI+2	82.8	1	0	12	0	2.51912	1	632.1	1	32.49	1	0.007	20
MCI+3	82.4	1	0	14	0	2.66463	1	1124	0	30.59	1	-0.223	20
MCI+4	68.2	0	1	14	1	2.58887	1	530	1	23.14	1	-0.41	22
MCI+5	74.4	0	1	18	0	2.949	0	1700	0	29.38	1	0.914	23
MCI+6	75.9	1	1	15	0	2.75888	1	1700	0	23.17	1	-0.192	23
MCI+7	73	0	0	12	1	2.82175	0	909.4	1	33.64	1	0.09	23
MCI+8	88	1	0	12	0	2.93938	0	892.1	1	38.61	1	-0.112	26
MCI+9	71.4	0	0	16	1	2.9305	0	778.8	1	35.37	1	0.773	23
MCI+10	64	0	1	18	1	3.05912	0	1700	0	30.06	1	1.39	22
MCI+11	70.9	0	1	20	1	2.82138	0	337.5	1	27.73	1	0.079	23
MCI+12	71	0	0	17	1	2.79438	0	737.1	1	46.13	1	0.102	25
MCI+13	75.9	1	1	14	0	2.89162	0	1272	0	24.45	1	-0.438	20
MCI+14	76.2	1	0	16	1	2.41087	1	651.3	1	51.53	1	-1.186	17
MCI+15	78.2	1	1	16	1	2.88075	0	697.3	1	30.48	1	-0.664	22
MCI+16	77.9	1	0	13	1	2.7515	1	608.9	1	37.45	1	0.727	23
MCI+17	69.3	0	1	18	0	2.413	1	1700	0	27.57	1	1.037	19
MCI+18	61	0	0	16	1	3.08562	0	1105	0	39.17	1	0.601	23
MCI+19	86.3	1	1	17	1	2.90987	0	667.9	1	27.55	1	-0.814	19
MCI+20	79.9	1	1	12	1	2.53337	1	733.7	1	52.77	1	-1.222	19
MCI+21	74.4	0	1	17	1	2.69738	1	1127	0	51.87	1	0.343	22
MCI+22	77.8	1	0	19	0	2.53762	1	748.8	1	74.27	1	-1.263	20
MCI+23	72.6	0	0	12	1	3.16425	0	617.8	1	57.71	1	-0.378	20
MCI+24	76	1	1	16	1	2.89237	0	845.8	1	50.75	1	-0.661	20
MCI+25	68.4	0	1	16	1	2.81462	0	888.5	1	36.33	1	0.17	19
MCI+26	55.2	0	1	16	1	2.92725	0	662.4	1	42.25	1	1.429	24
MCI+27	75	0	1	20	1	2.59075	1	408.4	1	56.81	1	1.547	22
MCI+28	59.8	0	1	15	1	2.99912	0	533.5	1	25.35	1	0.852	26
MCI+29	75.4	1	0	15	1	2.65187	1	818.6	1	29.74	1	-0.515	21
MCI+30	77.9	1	1	16	1	2.56137	1	883.9	1	33.02	1	1.773	21
