# Supplementary material for: Longitudinal stability of medial temporal lobe connectivity is associated with tau-related memory decline
Source: eLife. 2020 Dec 31;9:e62114. doi: 10.7554/eLife.62114 (PMC7803375; doi:10.7554/eLife.62114)
Supplement: Table 2—source data 1. [file elife-62114-table2-data1.xlsx]

## Sheet: Sheet1
ID	Mean MD at year 0	Mean MD at year 0_dichotomize	Mean MD at year 2	Mean MD at year 2 _dichotomize	MTL Stability	MTL Stability_dichotomize
CN-1	0.000925733	1	0.000986146	1	0.8129	1
CN-2	0.000778984	0	0.000793339	0	0.6776	1
CN-3	0.000877128	0	0.00096398	1	0.7796	1								CN_Ptau-	CN_Ptau+	MCI_Ptau+
CN-4	0.000727841	0	0.000819137	0	-0.0498	0					MD	MD	stability	N=26	N=18	N=30
CN-5	0.000892374	0	0.000921804	1	0.5373	0					year 0	year 2
CN-6	0.000899113	0	0.000886813	1	0.7426	1					high	high	stable	8	0	4
CN-7	0.000817401	0	0.000928005	1	0.2104	0					high	low	stable	0	0	3
CN-8	0.000860934	0	0.00095012	1	0.7394	1					low	high	stable	6	1	0
CN-9	0.00112072	1	0.000907523	1	0.8018	1					low	low	stable	4	7	4
CN-10	0.000895057	0	0.000913374	1	0.7502	1					high	high	instable	2	6	4
CN-11	0.000823288	0	0.00084969	0	0.76	1					high	low	instable	0	2	8
CN-12	0.000806007	0	0.000801023	0	0.6035	1					low	high	instable	3	0	3
CN-13	0.00107902	1	0.00116973	1	0.6365	1					low	low	instable	3	2	4
CN-14	0.000890449	0	0.000920751	1	0.8376	1
CN-15	0.000951643	1	0.000915641	1	0.8964	1
CN-16	0.000842601	0	0.000904825	1	0.2198	0
CN-17	0.000873515	0	0.00086989	0	0.8982	1
CN-18	0.000996933	1	0.000931744	1	0.9365	1
CN-19	0.000937072	1	0.000953565	1	0.4155	0
CN-20	0.00082922	0	0.000835319	0	0.5144	0
CN-21	0.000950053	1	0.00105844	1	-0.1528	0
CN-22	0.000929625	1	0.00101365	1	0.6402	1
CN-23	0.00103407	1	0.00102234	1	0.6948	1
CN-24	0.000774105	0	0.000779642	0	0.4755	0
CN-25	0.000923803	1	0.000918513	1	0.8488	1
CN-26	0.000878323	0	0.000918401	1	0.5747	1
CN+1	0.000899433	0	0.000843652	0	0.6536	1
CN+2	0.000949951	1	0.000915179	1	0.2405	0
CN+3	0.000895805	0	0.000899585	1	0.5706	1
CN+4	0.000864515	0	0.00085721	0	0.5614	1
CN+5	0.000923141	1	0.000883521	0	-0.0804	0
CN+6	0.000864275	0	0.000846028	0	0.36	0
CN+7	0.000985584	1	0.000887915	1	0.5267	0
CN+8	0.00114185	1	0.000865638	0	-0.4328	0
CN+9	0.000968001	1	0.00127555	1	-0.359	0
CN+10	0.00085145	0	0.000859085	0	0.7438	1
CN+11	0.000898978	0	0.000881255	0	0.6953	1
CN+12	0.000931714	1	0.000949823	1	0.1593	0
CN+13	0.000798751	0	0.000881597	0	0.2428	0
CN+14	0.00123753	1	0.000911217	1	-0.643	0
CN+15	0.000839214	0	0.000886397	0	0.8925	1
CN+16	0.000970172	1	0.00107137	1	0.305	0
CN+17	0.000881629	0	0.000878418	0	0.9422	1
CN+18	0.000870262	0	0.000866808	0	0.8566	1
MCI+1	0.000910141	1	0.000895432	1	0.7523	1
MCI+2	0.00105624	1	0.000869798	0	-0.4199	0
MCI+3	0.000933572	1	0.000933465	1	-0.0389	0
MCI+4	0.00090227	0	0.000781508	0	-0.6379	0
MCI+5	0.000930754	1	0.0008316	0	0.8379	1
MCI+6	0.00086427	0	0.000851762	0	0.9838	1
MCI+7	0.000952807	1	0.000816716	0	-0.2949	0
MCI+8	0.000883565	0	0.000974778	1	0.4285	0
MCI+9	0.0011084	1	0.000770454	0	0.3871	0
MCI+10	0.000782406	0	0.000748379	0	0.9508	1
MCI+11	0.000935806	1	0.000899069	1	0.1707	0
MCI+12	0.000843867	0	0.0010045	1	0.1223	0
MCI+13	0.000823335	0	0.000791396	0	0.4017	0
MCI+14	0.000908595	0	0.000904706	1	-0.1211	0
MCI+15	0.000953799	1	0.000837564	0	0.072	0
MCI+16	0.000880699	0	0.000816389	0	0.3638	0
MCI+17	0.000921149	1	0.000860578	0	0.3592	0
MCI+18	0.00106176	1	0.000796363	0	-0.4951	0
MCI+19	0.000949862	1	0.000876628	0	0.917	1
MCI+20	0.000981145	1	0.0009853	1	0.2732	0
MCI+21	0.000930763	1	0.00093537	1	0.6291	1
MCI+22	0.00107825	1	0.000874052	0	0.5476	0
MCI+23	0.0010882	1	0.00087232	0	-0.2419	0
MCI+24	0.000855564	0	0.000881279	0	0.2681	0
MCI+25	0.000925908	1	0.000852918	0	0.8336	1
MCI+26	0.000836187	0	0.000789332	0	0.6375	1
MCI+27	0.000980637	1	0.000947358	1	0.6689	1
MCI+28	0.000807685	0	0.000771099	0	0.7122	1
MCI+29	0.000965663	1	0.000889383	1	0.3726	0
MCI+30	0.000917496	1	0.000908892	1	0.9476	1
	0.000909368		0.000886605		0.5545
